# Supplementary material
Source: PubMed Central journal article supplement (PMC3129895)
Supplement: tableS1.pdf [file tableS1.pdf]

Supplementary Table 1. ATP values of normoxic and hypoxic WT and *Ppif*<sup>-/-</sup> tubules

|                                   | Normoxic      |               |               | Hypoxic       |               |               |
|-----------------------------------|---------------|---------------|---------------|---------------|---------------|---------------|
|                                   | Cold          | 15 min.       | 30 min.       | 75 min.       | 30 min.       | 60 min.       |
| Male WT                           | 3.93<br>±0.49 | 7.38<br>±0.71 | 9.19<br>±0.22 | 9.21<br>±0.07 | 0.54<br>±0.11 | 0.39<br>±0.06 |
| Male <i>Ppif</i> <sup>-/-</sup>   | 3.19<br>±0.49 | 6.40<br>±1.07 | 8.28<br>±0.53 | 8.01<br>±0.81 | 0.40<br>±0.07 | 0.34<br>±0.02 |
| Female WT                         | 5.07<br>±0.06 | 8.43<br>±0.53 | 8.54<br>±0.99 | 8.93<br>±0.59 | 0.40<br>±0.03 | 0.37<br>±0.02 |
| Female <i>Ppif</i> <sup>-/-</sup> | 4.74<br>±0.46 | 7.26<br>±0.66 | 8.24<br>±0.40 | 9.23<br>±0.26 | 0.44<br>±0.06 | 0.35<br>±0.02 |

Values are means±SE in nmol/mg protein for N=3-5.

Cold tubules were sampled at the end of isolation prior to rewarming.

Other samples were taken at the indicated durations of normoxic or hypoxic incubation under conditions detailed in the Methods.
